# Supplementary material for: Development of Cyclodextrin-Functionalized Transethoniosomes of 6-Gingerol: Statistical Optimization, In Vitro Characterization and Assessment of Cytotoxic and Anti-Inflammatory Effects
Source: MDPI journal article supplement (doi:10.3390/pharmaceutics14061170), 2022-05-30
Supplement: s1 [file s1]

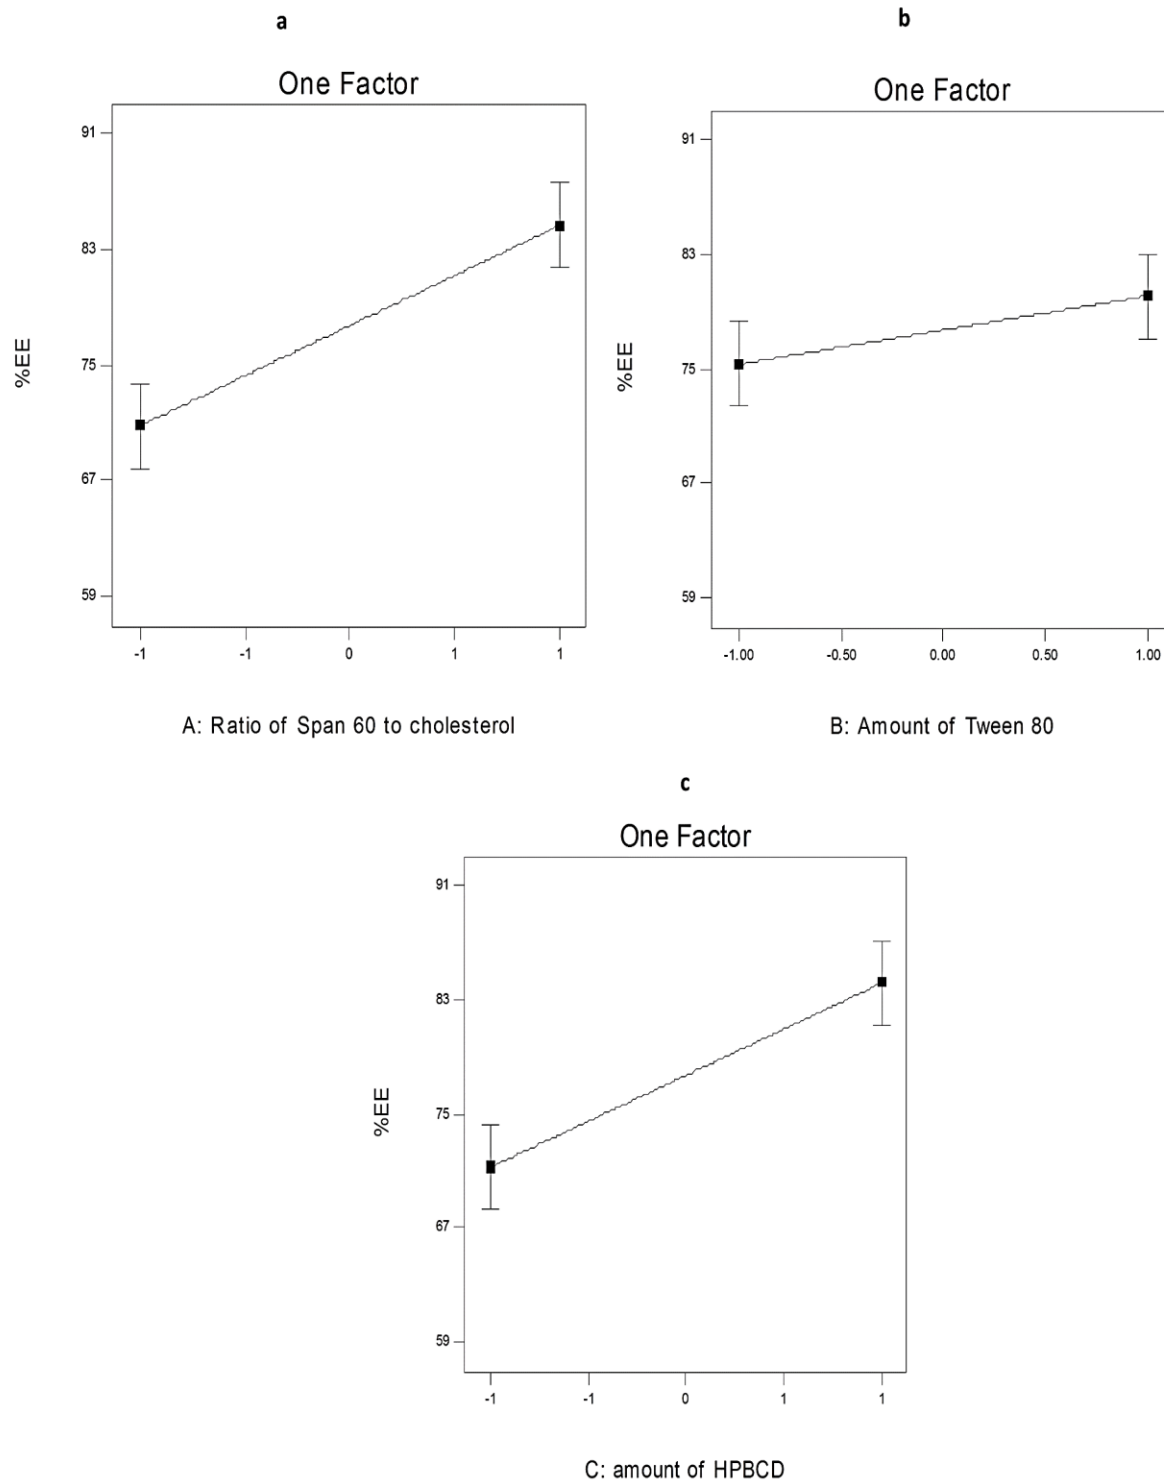

**Figure S1.** The impact of different independent variables; the amount of Span 60, amount of EA and the amount of HP $\beta$ CD on EE% of 6-G-loaded ENs according to 2<sup>3</sup> factorial design

**Abbreviation:** EE, entrapment efficiency of 6-G-loaded ENs; 6-G, 6-gingerol; ENs, ethoniosomes .

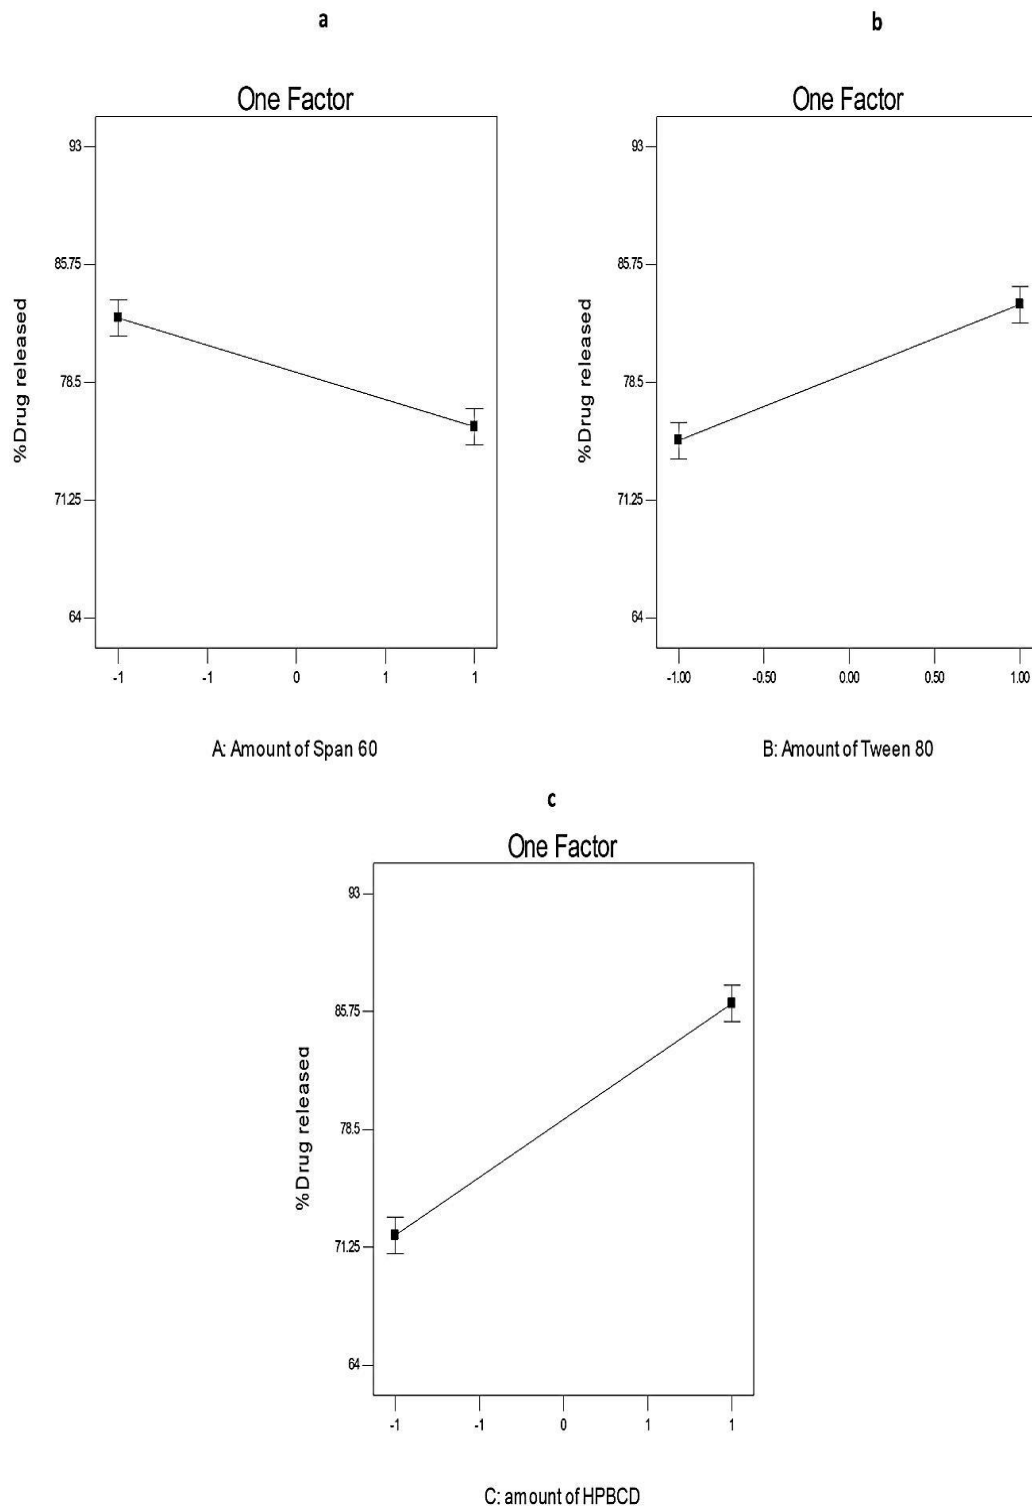

**Figure S2.** The effect of different independent variables; amount of non-ionic surfactant (a), type of non-ionic surfactant (b) and amount of EA (c) on  $Q_{24h}$  of 6-G-loaded ENs according to  $2^3$  factorial design

**Abbreviation:**  $Q_{24h}$ , % drug released after 24 h; 6-G, 6-gingerol; ENs, ethoniosomes .

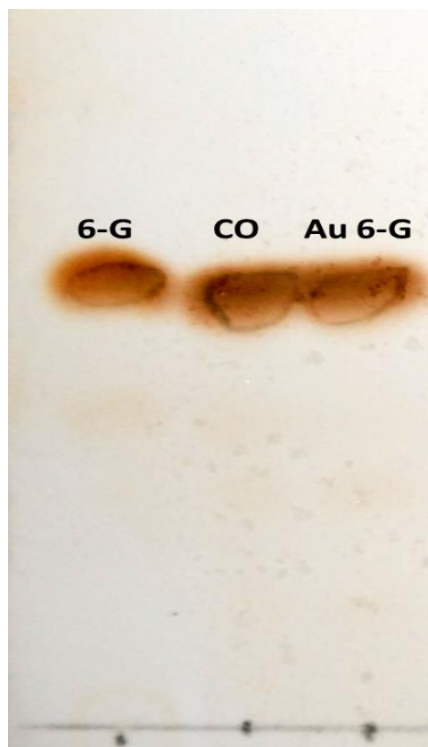

**Figure S3.** Reversed phase C<sub>18</sub> silica gel chromatogram of isolated 6-G co-chromatographed with authentic sample (Au 6-G)

Notes: Eluting system was methanol-water (8:2, v/v), visualization using vanillin/sulfuric acid spray reagent, and heating at 110 °C for 1 min. Abbreviation: 6-G; 6-Gingerol

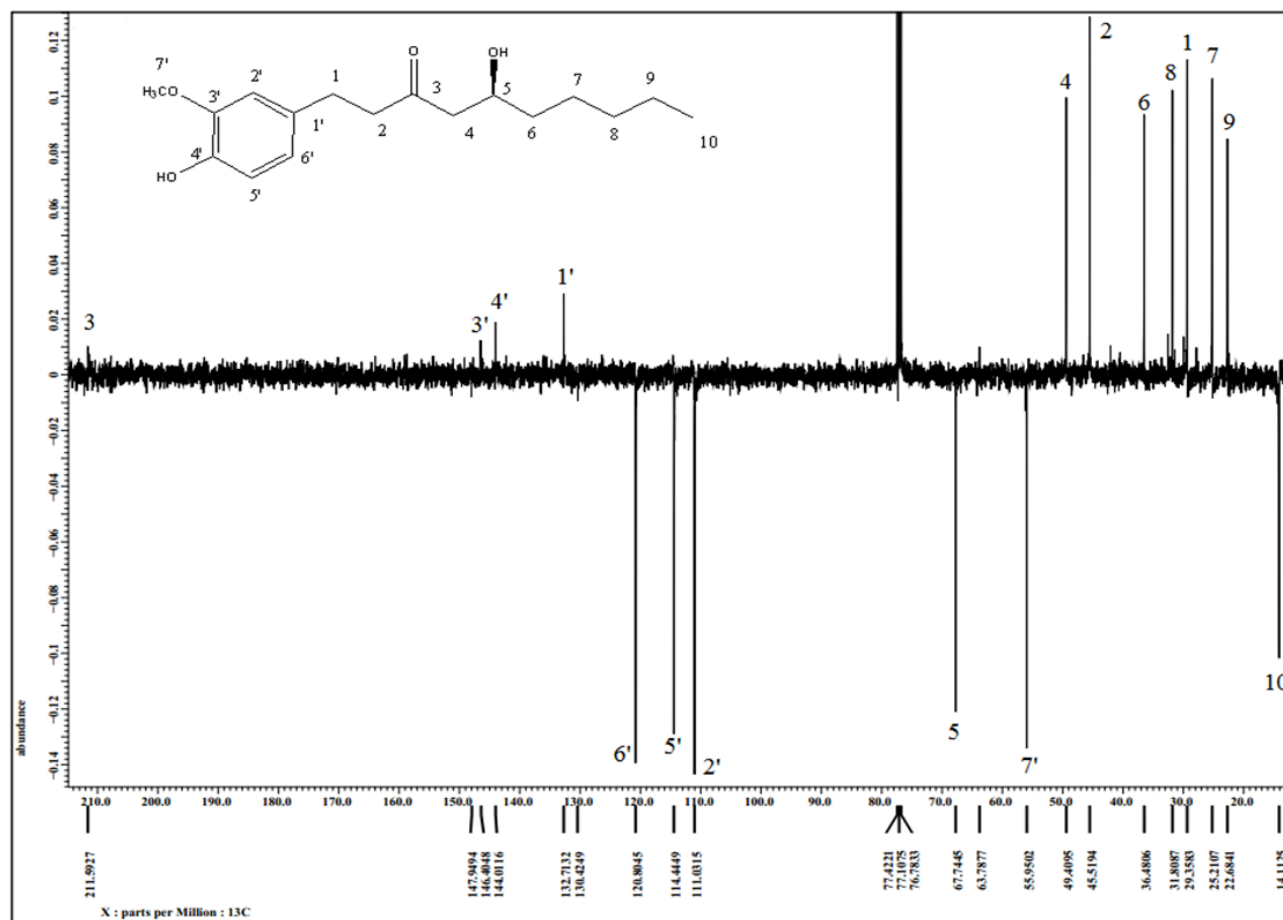

**Figure S4.**  $^{13}\text{C}$ -NMR (100 MHz,  $\text{CDCl}_3$ ) of 6-G, carbon multiplicities were determined by APT experiment. Abbreviation: 6-G; 6-Gingerol,  $^{13}\text{C}$ -NMR ; Carbon-13 nuclear magnetic resonance  $\text{CDCl}_3$ ; Chloroform- $d_1$ , APT; Attached proton test

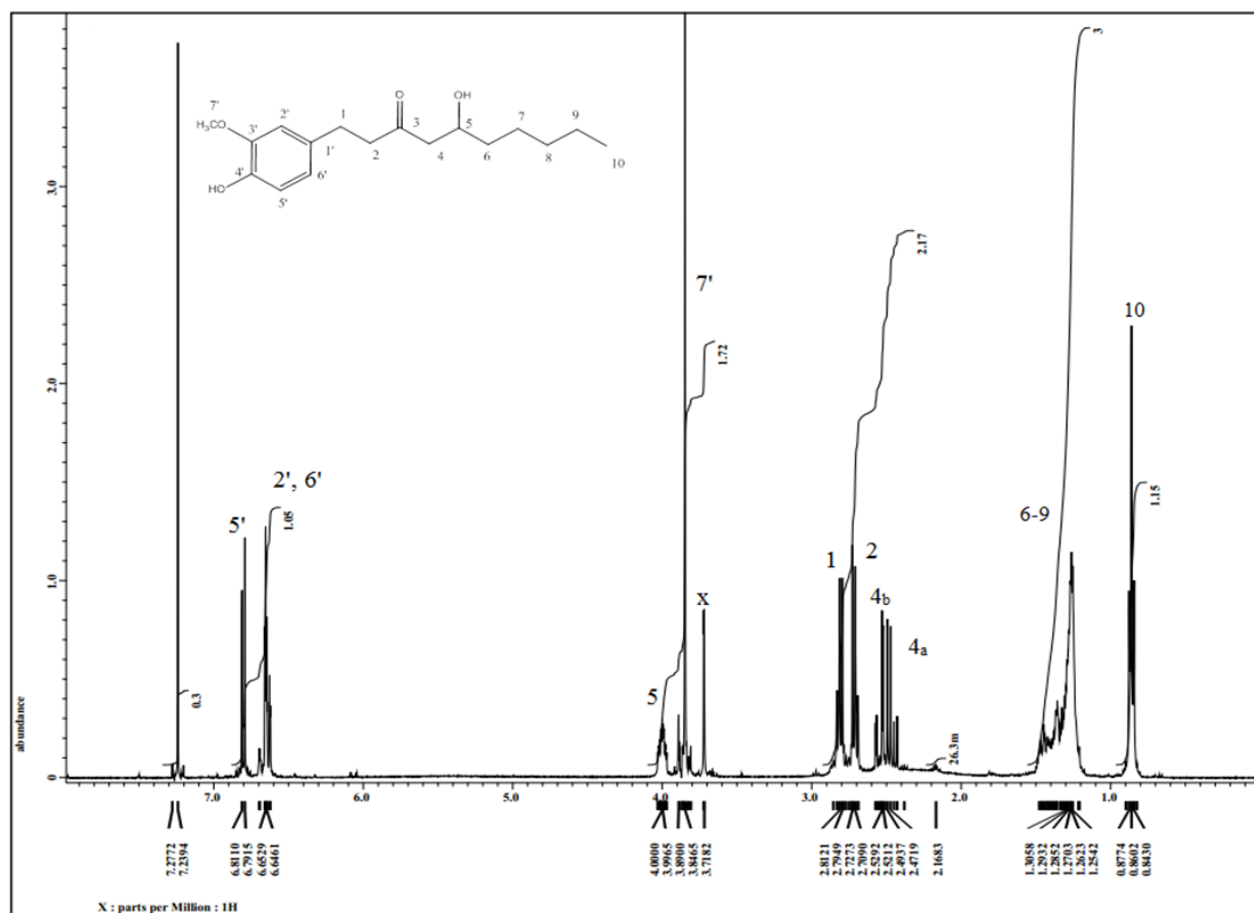

**Figure S5.** <sup>1</sup>H-NMR spectrum (400 MHz, CDCl<sub>3</sub>) of 6-G.  
 Abbreviation: 6-G; 6-Gingerol, <sup>1</sup>H-NMR spectrum; Proton nuclear magnetic resonance
